# Supplementary material for: Green Freight Asia (A): Driving the adoption of sustainable supply chain practices
Source: Frontiers journal article supplement (doi:10.3389/fpsyt.2021.767385), 2014-01-01
Supplement: Data_Sheet_1.pdf [file Data_Sheet_1.pdf]

## Appendix A

### Regression Correlation Matrices

**Table A1**

*Descriptive Statistics and Correlation Matrix for PHQ-9 Variables (n = 516)*

| Variable                                | <i>M</i> | <i>SD</i> | 1           | 2           | 3           | 4           | 5           | 6           | 7           | 8           | 9           | 10          |
|-----------------------------------------|----------|-----------|-------------|-------------|-------------|-------------|-------------|-------------|-------------|-------------|-------------|-------------|
| 1. PHQ                                  | 5.52     | 5.08      | -           |             |             |             |             |             |             |             |             |             |
| 2. Protective Equipment <sup>a</sup>    | 2.78     | 1.43      | <b>.29</b>  | -           |             |             |             |             |             |             |             |             |
| 3. COVID-19 Fear <sup>b</sup>           | 0.45     | 0.50      | <b>.24</b>  | <b>.23</b>  | -           |             |             |             |             |             |             |             |
| 4. Increased Workload <sup>b</sup>      | 0.58     | 0.50      | <b>.30</b>  | <b>.15</b>  | <b>.11</b>  | -           |             |             |             |             |             |             |
| 5. Work Conflict <sup>b</sup>           | 0.49     | 0.50      | <b>.29</b>  | <b>.20</b>  | <b>.13</b>  | <b>.35</b>  | -           |             |             |             |             |             |
| 6. COVID-19 Unit Infection <sup>b</sup> | 0.55     | 0.50      | <b>.14</b>  | <b>.13</b>  | .03         | <b>.20</b>  | <b>-.20</b> | -           |             |             |             |             |
| 7. Quarantined <sup>b</sup>             | 0.20     | 0.40      | <b>.11</b>  | .03         | <b>.07</b>  | <b>.07</b>  | <b>.11</b>  | <b>.15</b>  | -           |             |             |             |
| 8. Age <sup>c</sup>                     | 2.80     | 0.87      | <b>-.15</b> | <b>-.18</b> | .01         | <b>-.08</b> | <b>-.06</b> | -.06        | -.03        | -           |             |             |
| 9. Sex <sup>d</sup>                     | 0.76     | 0.43      | <b>.15</b>  | <b>.21</b>  | <b>.13</b>  | <b>.10</b>  | <b>.07</b>  | <b>.08</b>  | .00         | <b>-.20</b> | -           |             |
| 10. Self-Isolation <sup>b</sup>         | 0.15     | 0.36      | <b>.17</b>  | <b>.10</b>  | <b>.14</b>  | .07         | <b>.13</b>  | <b>.17</b>  | <b>.37</b>  | <b>-.09</b> | .02         | -           |
| 11. Chronic Medical <sup>b</sup>        | 0.33     | 0.47      | <b>.14</b>  | <b>.04</b>  | <b>.15</b>  | .03         | .05         | <b>.08</b>  | <b>.11</b>  | <b>.10</b>  | .04         | <b>.11</b>  |
| 12. Lives Alone <sup>b</sup>            | 0.07     | 0.26      | .04         | -.04        | <b>-.08</b> | -.05        | -.06        | -.01        | -.02        | <b>.11</b>  | .01         | .01         |
| 13. Work Position <sup>e</sup>          | 0.18     | 0.38      | <b>-.14</b> | <b>-.18</b> | <b>-.19</b> | <b>-.14</b> | <b>-.08</b> | <b>-.13</b> | <b>-.04</b> | .06         | <b>-.53</b> | <b>-.01</b> |

Note: Bold values show significance at  $p < .05$ .

<sup>a</sup> 1 = Definitely yes, 2 = Probably yes, 3 = Might or might not, 4 = Probably not, 5 = Definitely not

<sup>b</sup> 0 = No, 1 = Yes

<sup>c</sup> 1 = 18-24, 2 = 25-34, 3 = 35-49, and 4 = 50-65

<sup>d</sup> 0 = Male, 1 = Female

<sup>e</sup> 0 = Health Care Worker, 1 = Correctional Officer

**Table A2***Descriptive Statistics and Correlation Matrix for GAD7 Variables (n = 520)*

| Variable                                | <i>M</i> | <i>SD</i> | 1           | 2           | 3           | 4           | 5           | 6           | 7           | 8           | 9           | 10         |
|-----------------------------------------|----------|-----------|-------------|-------------|-------------|-------------|-------------|-------------|-------------|-------------|-------------|------------|
| 1. PHQ                                  | 6.05     | 5.79      | -           |             |             |             |             |             |             |             |             |            |
| 2. Protective Equipment <sup>a</sup>    | 2.77     | 1.42      | <b>.26</b>  | -           |             |             |             |             |             |             |             |            |
| 3. COVID-19 Fear <sup>b</sup>           | 0.45     | 0.50      | <b>.29</b>  | <b>.24</b>  | -           |             |             |             |             |             |             |            |
| 4. Increased Workload <sup>b</sup>      | 0.58     | 0.49      | <b>.30</b>  | <b>.15</b>  | <b>.11</b>  | -           |             |             |             |             |             |            |
| 5. Work Conflict <sup>b</sup>           | 0.49     | 0.50      | <b>.30</b>  | <b>.19</b>  | <b>.14</b>  | <b>.35</b>  | -           |             |             |             |             |            |
| 6. COVID-19 Unit Infection <sup>b</sup> | 0.55     | 0.50      | <b>.13</b>  | <b>.14</b>  | .03         | <b>.18</b>  | <b>.19</b>  | -           |             |             |             |            |
| 7. Quarantined <sup>b</sup>             | 0.21     | 0.40      | <b>.14</b>  | .04         | <b>.09</b>  | .07         | <b>.09</b>  | <b>.16</b>  | -           |             |             |            |
| 8. Age <sup>c</sup>                     | 2.81     | 0.87      | <b>-.25</b> | <b>-.19</b> | -.01        | <b>-.10</b> | -.06        | <b>-.07</b> | -.02        | -           |             |            |
| 9. Sex <sup>d</sup>                     | 0.76     | 0.43      | <b>.18</b>  | <b>.21</b>  | <b>.12</b>  | <b>.09</b>  | .06         | <b>.08</b>  | .01         | <b>-.20</b> | -           |            |
| 10. Self-Isolation <sup>b</sup>         | 0.16     | 0.37      | <b>.15</b>  | <b>.08</b>  | <b>.14</b>  | <b>.07</b>  | <b>.12</b>  | <b>.15</b>  | <b>.37</b>  | <b>-.09</b> | .04         | -          |
| 11. Chronic Medical <sup>b</sup>        | 0.33     | 0.47      | <b>.09</b>  | .04         | <b>.15</b>  | .04         | .05         | .06         | .10         | <b>.09</b>  | .04         | <b>.11</b> |
| 12. Lives Alone <sup>b</sup>            | 0.07     | 0.26      | -.05        | -.04        | <b>-.09</b> | -.06        | -.05        | -.01        | <b>-.02</b> | <b>.11</b>  | .00         | .00        |
| 13. Work Position <sup>e</sup>          | 0.18     | 0.38      | <b>-.11</b> | <b>-.18</b> | <b>-.19</b> | <b>-.14</b> | <b>-.08</b> | <b>-.12</b> | <b>-.05</b> | .06         | <b>-.53</b> | -.00       |

Note: Bold values show significance at  $p < .05$ .<sup>a</sup> 1 = Definitely yes, 2 = Probably yes, 3 = Might or might not, 4 = Probably not, 5 = Definitely not<sup>b</sup> 0 = No, 1 = Yes<sup>c</sup> 1 = 18-24, 2 = 25-34, 3 = 35-49, and 4 = 50-65<sup>d</sup> 0 = Male, 1 = Female<sup>e</sup> 0 = Health Care Worker, 1 = Correctional Officer

**Table A3***Descriptive Statistics and Correlation Matrix for MBI-2 Variables (n = 525)*

| Variable                                | <i>M</i> | <i>SD</i> | 1           | 2           | 3           | 4           | 5          | 6           | 7          | 8           | 9           | 10         |
|-----------------------------------------|----------|-----------|-------------|-------------|-------------|-------------|------------|-------------|------------|-------------|-------------|------------|
| 1. MBI-2                                | 3.76     | 3.05      | -           |             |             |             |            |             |            |             |             |            |
| 2. Protective Equipment <sup>a</sup>    | 2.76     | 1.43      | <b>.33</b>  | -           |             |             |            |             |            |             |             |            |
| 3. COVID-19 Fear <sup>b</sup>           | 0.45     | 0.50      | <b>.14</b>  | <b>.24</b>  | -           |             |            |             |            |             |             |            |
| 4. Increased Workload <sup>b</sup>      | 0.58     | 0.49      | <b>.37</b>  | <b>.16</b>  | <b>.16</b>  | -           |            |             |            |             |             |            |
| 5. Work Conflict <sup>b</sup>           | 0.49     | 0.50      | <b>.38</b>  | <b>.19</b>  | <b>.13</b>  | <b>.36</b>  | -          |             |            |             |             |            |
| 6. COVID-19 Unit Infection <sup>b</sup> | 0.55     | 0.50      | <b>.15</b>  | <b>.14</b>  | .04         | <b>.18</b>  | <b>.19</b> | -           |            |             |             |            |
| 7. Quarantined <sup>b</sup>             | 0.21     | 0.41      | <b>.10</b>  | .03         | <b>.08</b>  | .06         | <b>.09</b> | <b>.16</b>  | -          |             |             |            |
| 8. Age <sup>c</sup>                     | 2.82     | 0.86      | <b>-.18</b> | <b>-.19</b> | -.00        | -.10        | -.06       | -.07        | -.03       | -           |             |            |
| 9. Sex <sup>d</sup>                     | 0.76     | 0.43      | .03         | <b>.20</b>  | <b>.12</b>  | <b>.09</b>  | .05        | <b>.07</b>  | .00        | <b>-.19</b> | -           |            |
| 10. Self-Isolation <sup>b</sup>         | 0.16     | 0.37      | .05         | <b>.08</b>  | <b>.14</b>  | <b>.06</b>  | <b>.11</b> | <b>.15</b>  | <b>.37</b> | <b>-.09</b> | .04         | -          |
| 11. Chronic Medical <sup>b</sup>        | 0.33     | 0.47      | .03         | .04         | <b>.16</b>  | .03         | .04        | .07         | <b>.11</b> | <b>.10</b>  | .03         | <b>.13</b> |
| 12. Lives Alone <sup>b</sup>            | 0.07     | 0.26      | -.01        | -.04        | -.09        | -.06        | -.05       | -.01        | -.02       | <b>.11</b>  | .00         | .02        |
| 13. Work Position <sup>e</sup>          | 0.17     | 0.38      | <b>.11</b>  | <b>-.19</b> | <b>-.18</b> | <b>-.13</b> | -.07       | <b>-.12</b> | -.04       | .05         | <b>-.53</b> | -.01       |

Note: Bold values show significance at  $p < .05$ .<sup>a</sup> 1 = Definitely yes, 2 = Probably yes, 3 = Might or might not, 4 = Probably not, 5 = Definitely not<sup>b</sup> 0 = No, 1 = Yes<sup>c</sup> 1 = 18-24, 2 = 25-34, 3 = 35-49, and 4 = 50-65<sup>d</sup> 0 = Male, 1 = Female<sup>e</sup> 0 = Health Care Worker, 1 = Correctional Officer

**Table A4***Descriptive Statistics and Correlation Matrix for PROMIS Sleep Variables (n = 523)*

| Variable                                | <i>M</i> | <i>SD</i> | 1          | 2           | 3           | 4           | 5           | 6           | 7          | 8           | 9           | 10 | 11 | 12 | 13 |
|-----------------------------------------|----------|-----------|------------|-------------|-------------|-------------|-------------|-------------|------------|-------------|-------------|----|----|----|----|
| 1. MBI                                  | 10.86    | 1.83      | -          |             |             |             |             |             |            |             |             |    |    |    |    |
| 2. Protective Equipment <sup>a</sup>    | 2.75     | 1.42      | <b>.10</b> | -           |             |             |             |             |            |             |             |    |    |    |    |
| 3. COVID-19 Fear <sup>b</sup>           | 0.44     | 0.50      | <b>.08</b> | <b>.23</b>  | -           |             |             |             |            |             |             |    |    |    |    |
| 4. Increased Workload <sup>b</sup>      | 0.58     | 0.49      | -.00       | <b>.16</b>  | <b>.12</b>  | -           |             |             |            |             |             |    |    |    |    |
| 5. Work Conflict <sup>b</sup>           | 0.49     | 0.50      | .01        | <b>.20</b>  | <b>.14</b>  | <b>.36</b>  | -           |             |            |             |             |    |    |    |    |
| 6. COVID-19 Unit Infection <sup>b</sup> | 0.54     | 0.50      | .07        | <b>.13</b>  | .04         | <b>.19</b>  | <b>.20</b>  | -           |            |             |             |    |    |    |    |
| 7. Quarantined <sup>b</sup>             | 0.21     | 0.40      | .01        | .03         | <b>.09</b>  | .06         | <b>.10</b>  | <b>.15</b>  | -          |             |             |    |    |    |    |
| 8. Age <sup>c</sup>                     | 2.81     | 0.86      | -.07       | <b>-.19</b> | -.02        | <b>-.09</b> | -.07        | -.06        | -.01       | -           |             |    |    |    |    |
| 9. Sex <sup>d</sup>                     | 0.76     | 0.43      | <b>.13</b> | <b>.20</b>  | <b>.12</b>  | <b>.09</b>  | .06         | <b>.08</b>  | .00        | <b>-.21</b> | -           |    |    |    |    |
| 10. Self-Isolation <sup>b</sup>         | 0.16     | 0.37      | .03        | .09         | <b>.15</b>  | .07         | <b>.12</b>  | <b>.15</b>  | <b>.37</b> | <b>-.08</b> | .04         |    |    |    |    |
| 11. Chronic Medical <sup>b</sup>        | 0.33     | 0.47      | .07        | .04         | <b>.15</b>  | .04         | .04         | <b>.08</b>  | <b>.12</b> | <b>.09</b>  | .03         |    |    |    |    |
| 12. Lives Alone <sup>b</sup>            | 0.07     | 0.25      | -.04       | -.05        | <b>-.09</b> | -.06        | .07         | .01         | -.01       | <b>.11</b>  | .00         |    |    |    |    |
| 13. Work Position <sup>e</sup>          | 0.17     | 0.38      | <b>.13</b> | <b>-.19</b> | <b>-.19</b> | <b>-.13</b> | <b>-.07</b> | <b>-.13</b> | -.03       | .06         | <b>-.54</b> |    |    |    |    |

Note: Bold values show significance at  $p < .05$ .<sup>a</sup> 1 = Definitely yes, 2 = Probably yes, 3 = Might or might not, 4 = Probably not, 5 = Definitely not<sup>b</sup> 0 = No, 1 = Yes<sup>c</sup> 1 = 18-24, 2 = 25-34, 3 = 35-49, and 4 = 50-65<sup>d</sup> 0 = Male, 1 = Female<sup>e</sup> 0 = Health Care Worker, 1 = Correctional Officer

**Table A5***Descriptive Statistics and Correlation Matrix for IES-R Total Score Variables (n = 492)*

| Variable                                | <i>M</i> | <i>SD</i> | 1           | 2           | 3           | 4           | 5          | 6          | 7          | 8           | 9           |
|-----------------------------------------|----------|-----------|-------------|-------------|-------------|-------------|------------|------------|------------|-------------|-------------|
| 1. Constant                             | 15.26    | 16.20     | -           |             |             |             |            |            |            |             |             |
| 2. Protective Equipment <sup>a</sup>    | 2.76     | 1.42      | <b>.26</b>  | -           |             |             |            |            |            |             |             |
| 3. COVID-19 Fear <sup>b</sup>           | 0.44     | 0.50      | <b>.29</b>  | <b>.23</b>  | -           |             |            |            |            |             |             |
| 4. Increased Workload <sup>b</sup>      | 0.58     | 0.49      | <b>.30</b>  | <b>.16</b>  | <b>.12</b>  | -           |            |            |            |             |             |
| 5. Work Conflict <sup>b</sup>           | 0.48     | 0.50      | <b>.29</b>  | <b>.19</b>  | <b>.11</b>  | <b>.37</b>  | -          |            |            |             |             |
| 6. COVID-19 Unit Infection <sup>b</sup> | 0.54     | 0.50      | <b>.18</b>  | <b>.15</b>  | .05         | <b>.20</b>  | <b>.20</b> | -          |            |             |             |
| 7. Quarantined <sup>b</sup>             | 0.20     | 0.40      | <b>.14</b>  | .02         | .07         | .06         | <b>.09</b> | <b>.17</b> | -          |             |             |
| 8. Age <sup>c</sup>                     | 2.81     | 0.87      | <b>-.14</b> | <b>-.20</b> | -.04        | <b>-.09</b> | -.07       | -.07       | -.02       | -           |             |
| 9. Sex <sup>d</sup>                     | 0.77     | 0.42      | .09         | <b>.21</b>  | <b>.12</b>  | .07         | .06        | <b>.09</b> | -.02       | <b>-.19</b> | -           |
| 10. Self-Isolation <sup>b</sup>         | 0.16     | 0.36      | <b>.22</b>  | .08         | <b>.16</b>  | .07         | <b>.11</b> | <b>.14</b> | <b>.37</b> | <b>-.08</b> | .02         |
| 11. Chronic Medical <sup>b</sup>        | 0.33     | 0.47      | <b>.14</b>  | .02         | <b>.16</b>  | .04         | .05        | .07        | <b>.12</b> | <b>.09</b>  | .02         |
| 12. Lives Alone <sup>b</sup>            | 0.75     | 0.26      | -.06        | -.03        | -.08        | -.07        | -.04       | .00        | -.01       | <b>.12</b>  | -.01        |
| 13. Work Position <sup>e</sup>          | 0.17     | 0.38      | -.04        | <b>.16</b>  | <b>-.17</b> | <b>-.13</b> | -.05       | <b>.14</b> | -.04       | <b>.08</b>  | <b>-.53</b> |

Note: Bold values show significance at  $p < .05$ .<sup>a</sup> 1 = Definitely yes, 2 = Probably yes, 3 = Might or might not, 4 = Probably not, 5 = Definitely not<sup>b</sup> 0 = No, 1 = Yes<sup>c</sup> 1 = 18-24, 2 = 25-34, 3 = 35-49, and 4 = 50-65<sup>d</sup> 0 = Male, 1 = Female<sup>e</sup> 0 = Health Care Worker, 1 = Correctional Officer

**Table A6***Descriptive Statistics and Correlation Matrix for IES -R Avoidance Variables (n = 507)*

| Variable                                | <i>M</i> | <i>SD</i> | 1           | 2           | 3           | 4           | 5           | 6           | 7          | 8           | 9           |
|-----------------------------------------|----------|-----------|-------------|-------------|-------------|-------------|-------------|-------------|------------|-------------|-------------|
| 1. Constant                             | 5.50     | 6.16      | -           |             |             |             |             |             |            |             |             |
| 2. Protective Equipment <sup>a</sup>    | 2.76     | 1.42      | <b>.23</b>  | -           |             |             |             |             |            |             |             |
| 3. COVID-19 Fear <sup>b</sup>           | 0.44     | 0.50      | <b>.23</b>  | <b>.24</b>  | -           |             |             |             |            |             |             |
| 4. Increased Workload <sup>b</sup>      | 0.58     | 0.49      | <b>.25</b>  | <b>.16</b>  | <b>.12</b>  | -           |             |             |            |             |             |
| 5. Work Conflict <sup>b</sup>           | 0.48     | 0.50      | <b>.26</b>  | <b>.18</b>  | <b>.12</b>  | <b>.37</b>  | -           |             |            |             |             |
| 6. COVID-19 Unit Infection <sup>b</sup> | 0.54     | 0.50      | <b>.16</b>  | <b>.14</b>  | .05         | <b>.20</b>  | <b>.20</b>  | -           |            |             |             |
| 7. Quarantined <sup>b</sup>             | 0.20     | 0.40      | <b>.09</b>  | .02         | <b>.08</b>  | .06         | <b>.08</b>  | <b>.16</b>  | -          |             |             |
| 8. Age <sup>c</sup>                     | 2.80     | 0.87      | -.13        | <b>-.19</b> | -.03        | <b>-.09</b> | <b>-.07</b> | -.07        | -.01       | -           |             |
| 9. Sex <sup>d</sup>                     | 0.77     | 0.42      | .01         | <b>.20</b>  | <b>.12</b>  | <b>.08</b>  | .05         | <b>.10</b>  | -.01       | <b>-.19</b> | -           |
| 10. Self-Isolation <sup>b</sup>         | 0.15     | 0.36      | <b>.16</b>  | <b>.08</b>  | <b>.16</b>  | <b>.07</b>  | <b>.11</b>  | <b>.14</b>  | <b>.38</b> | <b>-.08</b> | .03         |
| 11. Chronic Medical <sup>b</sup>        | 0.33     | 0.47      | <b>.11</b>  | .03         | <b>.16</b>  | .05         | .05         | .07         | <b>.12</b> | <b>.09</b>  | .03         |
| 12. Lives Alone <sup>b</sup>            | 0.07     | 0.26      | <b>-.08</b> | -.03        | <b>-.08</b> | -.07        | -.04        | .00         | -.01       | <b>.12</b>  | -.01        |
| 13. Work Position <sup>e</sup>          | 0.18     | 0.38      | .03         | <b>-.17</b> | <b>-.17</b> | <b>-.14</b> | -.06        | <b>-.14</b> | -.05       | <b>.07</b>  | <b>-.53</b> |

Note: Bold values show significance at  $p < .05$ .<sup>a</sup> 1 = Definitely yes, 2 = Probably yes, 3 = Might or might not, 4 = Probably not, 5 = Definitely not<sup>b</sup> 0 = No, 1 = Yes<sup>c</sup> 1 = 18-24, 2 = 25-34, 3 = 35-49, and 4 = 50-65<sup>d</sup> 0 = Male, 1 = Female<sup>e</sup> 0 = Health Care Worker, 1 = Correctional Officer

**Table A7***Descriptive Statistics and Correlation Matrix for IES-R Hyperarousal Variables (n = 518)*

| Variable                                | <i>M</i> | <i>SD</i> | 1           | 2           | 3           | 4           | 5          | 6           | 7          | 8           | 9           |
|-----------------------------------------|----------|-----------|-------------|-------------|-------------|-------------|------------|-------------|------------|-------------|-------------|
| 1. Constant                             | 4.20     | 4.85      | -           |             |             |             |            |             |            |             |             |
| 2. Protective Equipment <sup>a</sup>    | 2.77     | 1.42      | <b>.24</b>  | -           |             |             |            |             |            |             |             |
| 3. COVID-19 Fear <sup>b</sup>           | 0.45     | 0.50      | <b>.29</b>  | <b>.23</b>  | -           |             |            |             |            |             |             |
| 4. Increased Workload <sup>b</sup>      | 0.58     | 0.49      | <b>.28</b>  | <b>.16</b>  | <b>.13</b>  | -           |            |             |            |             |             |
| 5. Work Conflict <sup>b</sup>           | 0.49     | 0.50      | <b>.29</b>  | <b>.18</b>  | <b>.13</b>  | <b>.36</b>  | -          |             |            |             |             |
| 6. COVID-19 Unit Infection <sup>b</sup> | 0.54     | 0.50      | <b>.14</b>  | <b>.13</b>  | .03         | <b>.20</b>  | <b>.19</b> | -           |            |             |             |
| 7. Quarantined <sup>b</sup>             | 0.21     | 0.40      | <b>.11</b>  | .02         | <b>.08</b>  | .06         | <b>.09</b> | <b>.16</b>  | -          |             |             |
| 8. Age <sup>c</sup>                     | 2.81     | 0.87      | <b>-.12</b> | <b>-.18</b> | -.02        | <b>-.09</b> | -.06       | <b>-.08</b> | -.02       | -           |             |
| 9. Sex <sup>d</sup>                     | 0.76     | 0.43      | <b>.12</b>  | <b>.21</b>  | <b>.13</b>  | <b>.08</b>  | .06        | <b>.08</b>  | -.01       | <b>-.20</b> | -           |
| 10. Self-Isolation <sup>b</sup>         | 0.16     | 0.37      | <b>.17</b>  | <b>.08</b>  | <b>.15</b>  | .06         | .11        | <b>.15</b>  | <b>.37</b> | <b>-.08</b> | .03         |
| 11. Chronic Medical <sup>b</sup>        | 0.34     | 0.47      | <b>.15</b>  | .04         | <b>.16</b>  | .04         | <b>.05</b> | .07         | <b>.11</b> | <b>.10</b>  | .02         |
| 12. Lives Alone <sup>b</sup>            | 0.71     | 0.26      | -.06        | -.03        | <b>-.08</b> | -.07        | -.05       | .00         | -.01       | <b>.11</b>  | .00         |
| 13. Work Position <sup>e</sup>          | 0.17     | 0.38      | -.08        | <b>-.18</b> | <b>-.19</b> | <b>-.12</b> | -.06       | <b>-.12</b> | -.03       | .06         | <b>-.54</b> |

Note: Bold values show significance at  $p < .05$ .<sup>a</sup> 1 = Definitely yes, 2 = Probably yes, 3 = Might or might not, 4 = Probably not, 5 = Definitely not<sup>b</sup> 0 = No, 1 = Yes<sup>c</sup> 1 = 18-24, 2 = 25-34, 3 = 35-49, and 4 = 50-65<sup>d</sup> 0 = Male, 1 = Female<sup>e</sup> 0 = Health Care Worker, 1 = Correctional Officer

**Table A8***Descriptive Statistics and Correlation Matrix for IES-R Intrusion Variables (n = 515)*

| Variable                                | <i>M</i> | <i>SD</i> | 1           | 2           | 3           | 4           | 5           | 6           | 7          | 8           | 9           |
|-----------------------------------------|----------|-----------|-------------|-------------|-------------|-------------|-------------|-------------|------------|-------------|-------------|
| 1. Constant                             | 5.66     | 6.41      | -           |             |             |             |             |             |            |             |             |
| 2. Protective Equipment <sup>a</sup>    | 2.76     | 1.42      | <b>.25</b>  | -           |             |             |             |             |            |             |             |
| 3. COVID-19 Fear <sup>b</sup>           | 0.44     | 0.50      | <b>.32</b>  | <b>.23</b>  | -           |             |             |             |            |             |             |
| 4. Increased Workload <sup>b</sup>      | 0.58     | 0.49      | <b>.28</b>  | <b>.16</b>  | <b>.13</b>  | -           |             |             |            |             |             |
| 5. Work Conflict <sup>b</sup>           | 0.48     | 0.50      | <b>.28</b>  | <b>.19</b>  | <b>.12</b>  | <b>.37</b>  | -           |             |            |             |             |
| 6. COVID-19 Unit Infection <sup>b</sup> | 0.53     | 0.50      | <b>.16</b>  | <b>.13</b>  | .04         | <b>.19</b>  | <b>.19</b>  | -           |            |             |             |
| 7. Quarantined <sup>b</sup>             | 0.21     | 0.40      | <b>.17</b>  | .03         | <b>.08</b>  | .05         | <b>.09</b>  | <b>.16</b>  | -          |             |             |
| 8. Age <sup>c</sup>                     | 2.80     | 0.87      | <b>-.11</b> | <b>-.19</b> | -.02        | <b>-.09</b> | <b>-.08</b> | -.07        | -.02       | -           |             |
| 9. Sex <sup>d</sup>                     | 0.77     | 0.42      | <b>.12</b>  | <b>.21</b>  | <b>.13</b>  | <b>.08</b>  | .07         | <b>.09</b>  | -.01       | <b>-.19</b> | -           |
| 10. Self-Isolation <sup>b</sup>         | 0.16     | 0.36      | <b>.23</b>  | <b>.09</b>  | <b>.15</b>  | .06         | <b>.12</b>  | <b>.16</b>  | <b>.37</b> | <b>-.09</b> | .04         |
| 11. Chronic Medical <sup>b</sup>        | 0.33     | 0.47      | <b>.13</b>  | .03         | <b>.15</b>  | .04         | .04         | .07         | <b>.11</b> | <b>.09</b>  | .03         |
| 12. Lives Alone <sup>b</sup>            | 0.07     | 0.26      | -.03        | -.03        | -.08        | -.07        | -.04        | .00         | -.01       | <b>.12</b>  | -.01        |
| 13. Work Position <sup>e</sup>          | 0.18     | 0.38      | <b>-.12</b> | <b>-.18</b> | <b>-.18</b> | <b>-.14</b> | -.07        | <b>-.13</b> | -.04       | .07         | <b>-.54</b> |

Note: Bold values show significance at  $p < .05$ .<sup>a</sup> 1 = Definitely yes, 2 = Probably yes, 3 = Might or might not, 4 = Probably not, 5 = Definitely not<sup>b</sup> 0 = No, 1 = Yes<sup>c</sup> 1 = 18-24, 2 = 25-34, 3 = 35-49, and 4 = 50-65<sup>d</sup> 0 = Male, 1 = Female<sup>e</sup> 0 = Health Care Worker, 1 = Correctional Officer



**Table A9***Descriptive Statistics and Correlation Matrix for CD-RISC-2 Variables (n = 526)*

| Variable                                | <i>M</i> | <i>SD</i> | 1           | 2           | 3           | 4           | 5           | 6           | 7          | 8           | 9           |
|-----------------------------------------|----------|-----------|-------------|-------------|-------------|-------------|-------------|-------------|------------|-------------|-------------|
| 1. Constant                             | 6.61     | 1.57      | -           |             |             |             |             |             |            |             |             |
| 2. Protective Equipment <sup>a</sup>    | 2.77     | 1.42      | <b>-.17</b> | -           |             |             |             |             |            |             |             |
| 3. COVID-19 Fear <sup>b</sup>           | 0.45     | .50       | <b>-.24</b> | <b>.23</b>  | -           |             |             |             |            |             |             |
| 4. Increased Workload <sup>b</sup>      | 0.58     | 0.50      | -.04        | <b>.16</b>  | <b>.12</b>  | -           |             |             |            |             |             |
| 5. Work Conflict <sup>b</sup>           | 0.49     | 0.50      | -.05        | <b>.19</b>  | <b>.13</b>  | <b>.36</b>  | -           |             |            |             |             |
| 6. COVID-19 Unit Infection <sup>b</sup> | 0.55     | 0.50      | .00         | <b>.14</b>  | .04         | <b>.18</b>  | <b>.19</b>  | -           |            |             |             |
| 7. Quarantined <sup>b</sup>             | 0.21     | 0.40      | <b>-.08</b> | .03         | <b>.08</b>  | .06         | <b>.09</b>  | <b>.15</b>  | -          |             |             |
| 8. Age <sup>c</sup>                     | 2.81     | 0.87      | .06         | <b>-.18</b> | -.01        | <b>-.09</b> | -.07        | -.07        | -.02       | -           |             |
| 9. Sex <sup>d</sup>                     | 0.76     | 0.43      | <b>-.16</b> | <b>.20</b>  | <b>.12</b>  | <b>.09</b>  | .06         | <b>.08</b>  | .01        | <b>-.20</b> | -           |
| 10. Self-Isolation <sup>b</sup>         | 0.16     | 0.36      | -.01        | <b>.09</b>  | <b>.15</b>  | .06         | <b>.12</b>  | <b>.15</b>  | <b>.37</b> | <b>-.09</b> | .04         |
| 11. Chronic Medical <sup>b</sup>        | 0.34     | 0.47      | -.07        | .04         | <b>.15</b>  | .03         | .05         | .07         | <b>.11</b> | <b>.10</b>  | .03         |
| 12. Lives Alone <sup>b</sup>            | 0.07     | 0.26      | -.05        | -.03        | <b>-.08</b> | -.07        | -.05        | .00         | -.01       | <b>.11</b>  | .00         |
| 13. Work Position <sup>e</sup>          | 0.17     | 0.38      | <b>-.07</b> | <b>-.18</b> | <b>-.18</b> | <b>-.14</b> | <b>-.07</b> | <b>-.13</b> | -.05       | .06         | <b>-.52</b> |

Note: Bold values show significance at  $p < .05$ .<sup>a</sup> 1 = Definitely yes, 2 = Probably yes, 3 = Might or might not, 4 = Probably not, 5 = Definitely not<sup>b</sup> 0 = No, 1 = Yes<sup>c</sup> 1 = 18-24, 2 = 25-34, 3 = 35-49, and 4 = 50-65<sup>d</sup> 0 = Male, 1 = Female<sup>e</sup> 0 = Health Care Worker, 1 = Correctional Officer
